# Supplementary material for: CIB4 is essential for the haploid phase of spermatogenesis in mice
Source: PubMed Central journal article supplement (PMC7401386; doi:10.1093/biolre/ioaa059), 2020-04-25
Supplement: xu_et_al_supplementary_data_ioaa059.pdf [file xu_et_al_supplementary_data_ioaa059.pdf]

## Supplementary Figure S1

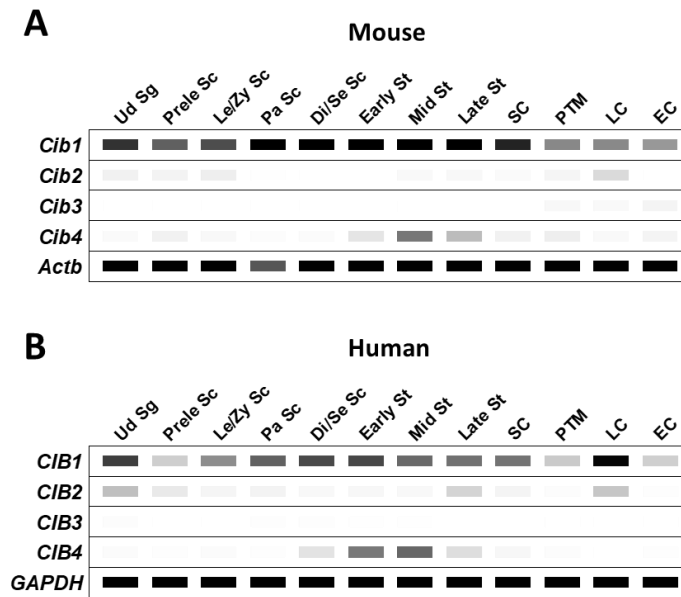

### Supplementary Figure S1. Single-cell RNA-sequencing database depicting the expression of CIB family during mouse and human spermatogenesis.

**A.** Median-normalized levels of mRNA expression of the *Cib* family members during spermatogenesis in mice. *Actb* was used as an expression control. The level of mRNA expression in each cell type is indicated by the intensity of each band. White: median-normalized reads = 0; Black: median-normalized reads  $\geq 4$ ; Gray:  $0 < \text{median-normalized reads} < 4$ .

**B.** Median-normalized levels of mRNA expression of CIB family members during spermatogenesis in human. *GAPDH* was used as an expression control. The level of mRNA expression in each cell type is indicated by the intensity of each band. White: median-normalized reads = 0; Black: median-normalized reads  $\geq 6$ ; Gray:  $0 < \text{median-normalized reads} < 6$ .

Ud Sg, undifferentiated spermatogonia; Prele Sc, preleptotene spermatocytes; Le/Zy Sc, leptotene/zygotene spermatocytes; Pa Sc, pachytene spermatocytes; Di/Se Sc, diplotene/secondary spermatocytes; Early St, early round spermatids; Mid St, mid round spermatids; Late St, late round spermatids; SC, Sertoli cells; PTM, peritubular myoid cells; LC, Leydig cells; EC, endothelial cells.

## Supplementary Figure S2

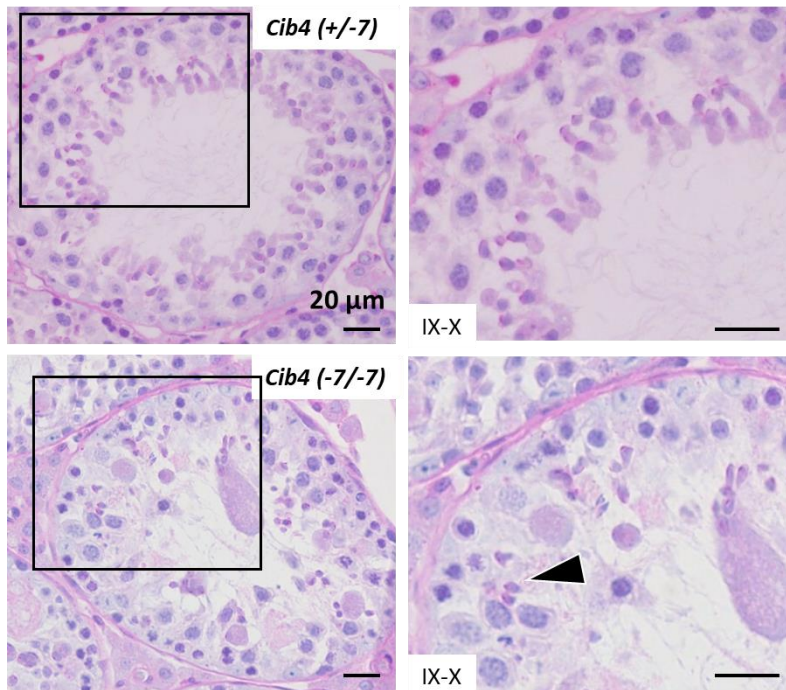

### Supplementary Figure S2. PAS staining of stage IX-X seminiferous tubules.

In stage IX-X seminiferous tubules, there are fewer elongating spermatids (black arrow) in *Cib4*<sup>-7/-7</sup> testis. Black rectangles indicate magnified regions.

### Supplementary Figure S3

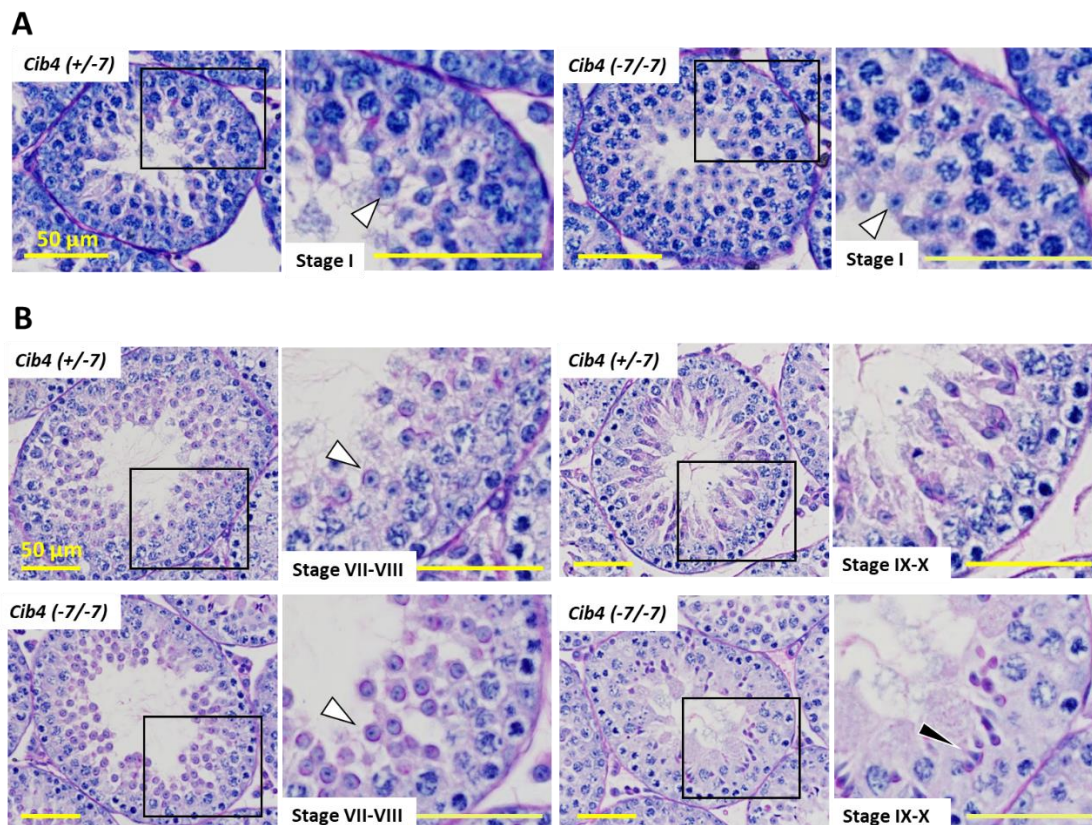

**Supplementary Figure S3. First wave of spermatogenesis at postnatal day 21 and day 28.** A. PAS staining of testes cross-sections at postnatal day 21 showed normal round spermatids (white arrowheads) in stage I seminiferous tubules of *Cib4*<sup>+/-7</sup> and *Cib4*<sup>-7/-7</sup> mice. B. PAS staining of testes cross-sections at postnatal day 28 showed normal round spermatids (white arrowheads) in stage VII-VIII seminiferous tubules of *Cib4*<sup>+/-7</sup> and *Cib4*<sup>-7/-7</sup> mice. In contrast, abnormally transformed spermatids (black arrowhead) were found in stage IX-X seminiferous tubules of *Cib4*<sup>-7/-7</sup> mice. Black rectangles indicate magnified regions.

### Supplementary Figure S4

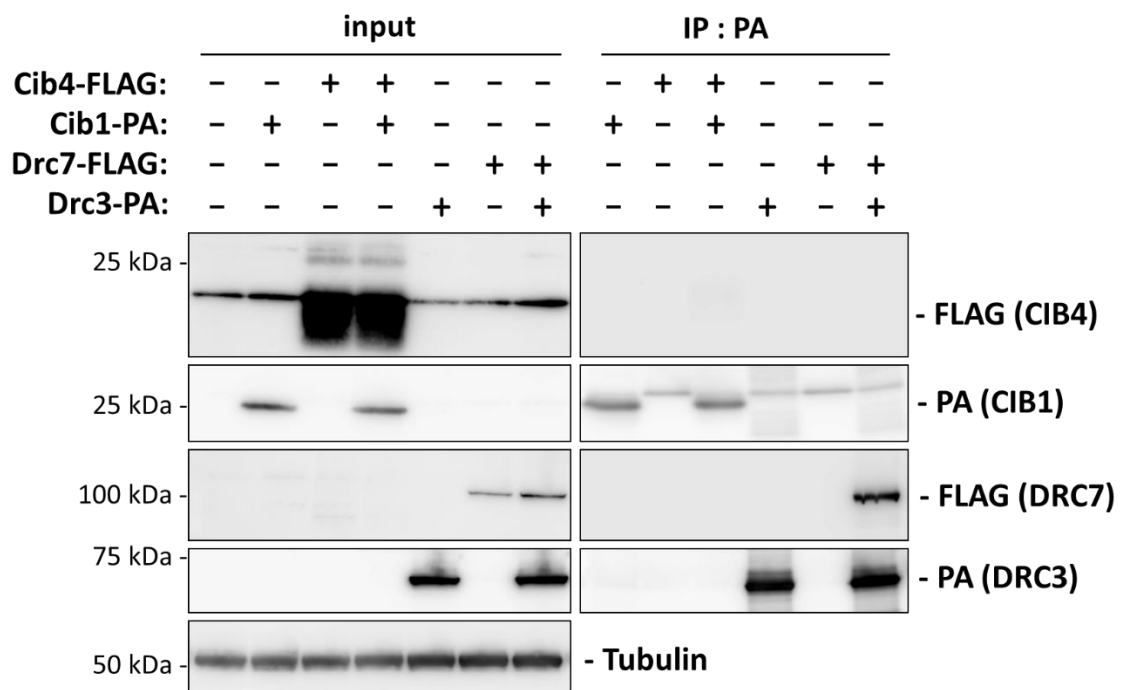

### Supplementary Figure S4. Analysis of CIB1-CIB4 interaction.

Interaction of CIB1-PA and CIB4-FLAG was not detected. Interaction of DRC3-PA and DRC7-FLAG was confirmed as a positive control.  $\alpha$ -Tubulin was used as a loading control.

**Supplementary Table S1. Sequences of primers**

| <b>Gene</b>  | <b>Method</b> | <b>Species</b> | <b>Forward Primer</b>                  | <b>Reverse Primer</b>            |
|--------------|---------------|----------------|----------------------------------------|----------------------------------|
| <i>Cib1</i>  | RT            | Mouse          | ATGGGAGGTTCGGGCAGTCG                   | CAGGACAATCTTAAAGGAGC             |
| <i>Cib2</i>  | RT            | Mouse          | GACCATCTTCACTGAAGAGC                   | GATTCGAATGTGGAAGGTGC             |
| <i>Cib3</i>  | RT            | Mouse          | AGGCTGTTCTATCGATACC                    | GATGCGGATGTGGAAGGTGC             |
| <i>Cib4</i>  | RT            | Mouse          | AAGGTACCAGATGCAGTGGG                   | GCAGCCCCAGAAGTGAATCC             |
| <i>Actb</i>  | RT            | Mouse          | CATCCGTAAAGACCTCTATGCCAAC              | ATGGAGCCACCGATCCACA              |
| <i>Cib4</i>  | Genotyping    | Mouse          | TGGAGGTGAGGGTTCTTAGC                   | GTTCTGTCCTGGATCTGTGACC           |
| <i>CIB1</i>  | RT            | Human          | CAGATTCTCAGCCTTCCAGAG                  | CAAAGTCAAAGATGCGGAAGG            |
| <i>CIB2</i>  | RT            | Human          | TCGAGGACATGATTGCCAAG                   | GTGTAAACCCAGAGGCTG               |
| <i>CIB3</i>  | RT            | Human          | GCGACCTCAAGGCTTACTATG                  | CAGCACCTTCTCACATAACCAG           |
| <i>CIB4</i>  | RT            | Human          | AGCCTGAAGATTGAGTATGCC                  | AACTCTGAGAAGGACAGCATG            |
| <i>GAPDH</i> | RT            | Human          | AATCCCATCACCATCTTCCAG                  | ATGACCCTTTTGGCTCCC               |
| <i>Cib1</i>  | Cloning       | Mouse          | AAGGATCCGCCGCCATGGGAGGT<br>TCGGGCAGTCG | AAGTCGACCAGGACAATCTTAA<br>AGGAGC |
| <i>Cib4</i>  | Cloning       | Mouse          | AAGGATCCGCCGCCATGGGGCA<br>GTGTTTAAGG   | AAGAATTCGAGCCCCAGAAGT<br>GAATCC  |
